# Supplementary material for: Incidental Findings in Patients With Cleft Lip and Palate: A Case-Control Study
Source: Preprints.org preprint supplement (doi:10.20944/preprints202407.0509.v1), 2024-07-05
Supplement: Supplementary file 1 [file Supplementary Materials.docx]

**Supplementary Materials**

**Table S1:** Summary of potential IFs screened in the study by anatomical area.

| I & II. Dental abnormalities in the Maxilla & Mandible | | |
| --- | --- | --- |
| *a. Variations in the number of teeth* | *b. Variations in the morphology of teeth* | *c. Variations in teeth position* |
| 1. Teeth agenesis | 1. Hypoplasia | 1. Transposition |
| 2. Anodontia | 2. Hypocalcification | 2. Malposition ( & ectopic tooth) |
| 3. Hypodontia | 3. Microdontia | 3. Rotation |
| 4. Oligodontia | 4. Peg-shaped teeth | 4. Impaction (including third molars) |
| 5. Supernumerary teeth | 5. Taurodontism |
| 6. Root dilaceration |
| 7. Dens in vaginatus (dens in dente) |
| 8. Dens evaginatus |
| 9. Dentine dysplasia |
| 10. Teeth fusion |
| 11. Tooth gemination |
| 12. Curved maxillary central incisors (root) |
| 13. Macrodontia |
| 14. Compound Odontoma |
| 15. Dentinogenesis imperfecta |
| 16. Amelogenesis imperfecta |
| *d. Other abnormalities* | | |
| Mandibular tori | | |
|  | | |
| III. Paranasal sinuses | | |
| 1. Retention cysts | | |
| 2. Obstructed sinus | | |
| 3. Sinusitis - Mucosal thickening (R/L/bilateral) | | |
| 4. Pansinusitis | | |
| 5. Mucous retention pseudocysts | | |
| 6. Antral polyps | | |
| 7. Concha bullosa | | |
| 7. Concha bullosa | | |
| 9. Antrolith | | |
|  | | |
| IV. Middle and inner ear | | |
| 1. Inflammatory or abnormal congenital condition | | |
| 2. Middle ear opacification | | |
| 3. Severely underdeveloped vestibule (hearing loss) | | |
|  | | |
| V. Nasal cavity | | |
| 1. Deviated septum | | |
| 2. Nasal polyps | | |
|  | | |
| VI. Orbit | | |
| 1. Enlarged orbit (Buphthalmia) | | |
|  | | |
| VII. Skull | | |
| 1. Skull malformations | | |
|  | | |
| VIII. Cervical spine | | |
| 1. Degenerative changes in vertebrae | | |
|  | | |
| IX. TMJ structures | | |
| 1. Osteoarthrosis | | |
| 2. Condylar degenerative changes - possible resorption condylar head | | |
| 3. Condylar hyperplasia | | |
| 4. Condylar hypoplasia | | |
| 5. Coronoid hyperplasia | | |
| 6. Subcondylar cyst | | |
| 7. Flat condylar margin | | |
| 8. Bifid condyle | | |
| 9. Osteophyte | | |
|  | | |
| X. Soft-tissue calcifications | | |
| 1. Sialolith | | |
| 2. Tonsillolith | | |
| 3. Pineal gland calcification | | |
| 4. Calcified stylohyoid ligament | | |
| 5. Carotid artery calcification | | |
| 6. Vertebral artery calcification | | |
| 7. Thyroid cartilage calcification | | |
